# Supplementary material for: Organic nanocrystals with tunable morphologies and optical properties prepared through a sonication technique
Source: Royal Society of Chemistry journal article supplement (doi:10.1039/b604645m), 2006-01-01
Supplement: b604645m.pdf [file b604645m.pdf]

## Electronic Supplementary Information (ESI)

### Organic nanocrystals with tunable morphologies and optical properties prepared through a sonication technique

Yong Sheng Zhao, and Jiannian Yao\*

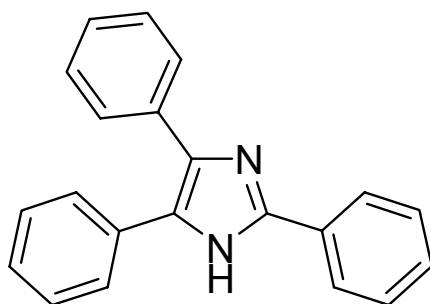

**Figure S1.** Molecular structure of 2,4,5-triphenylimidazole (lophine)

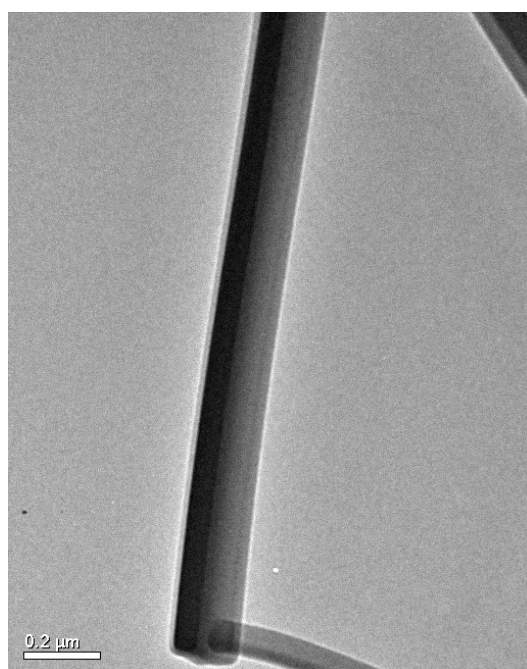

**Figure S2.** TEM images of the lophine nanorods. The rods were removed from the substrates by sonication in water, and then a drop of dispersed products was placed onto the copper grid.

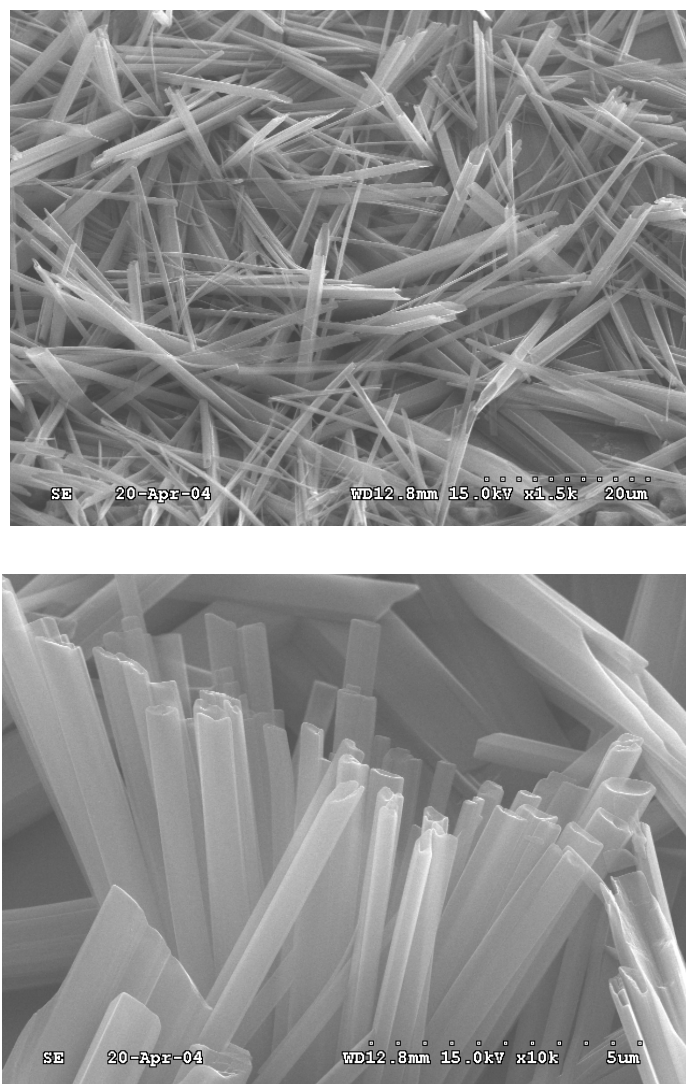

**Figure S3.** SEM images of the products obtained with the concentration of  $5 \times 10^{-5}$  (top) and  $5 \times 10^{-4}$  M (bottom) respectively.

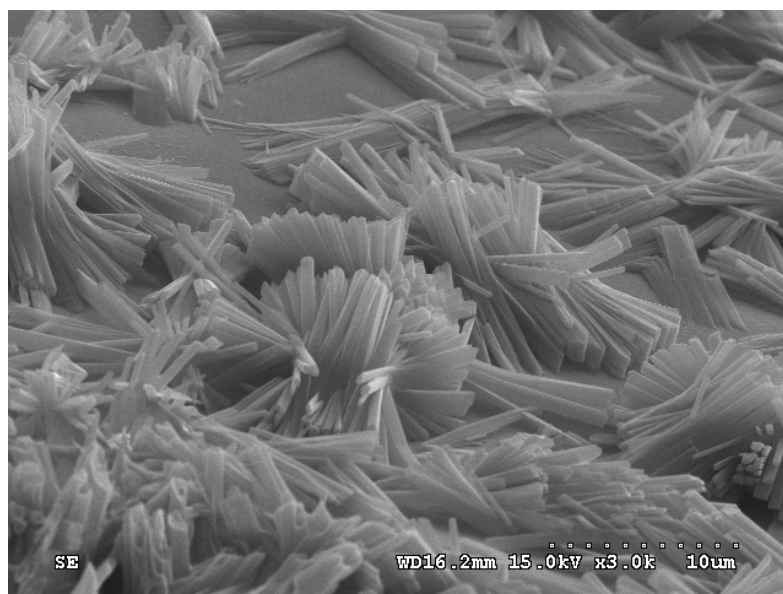

**Figure S4.** SEM image of the nanorod arrays prepared with the lophine ethanol solution of  $10^{-2}$  M in concentration.

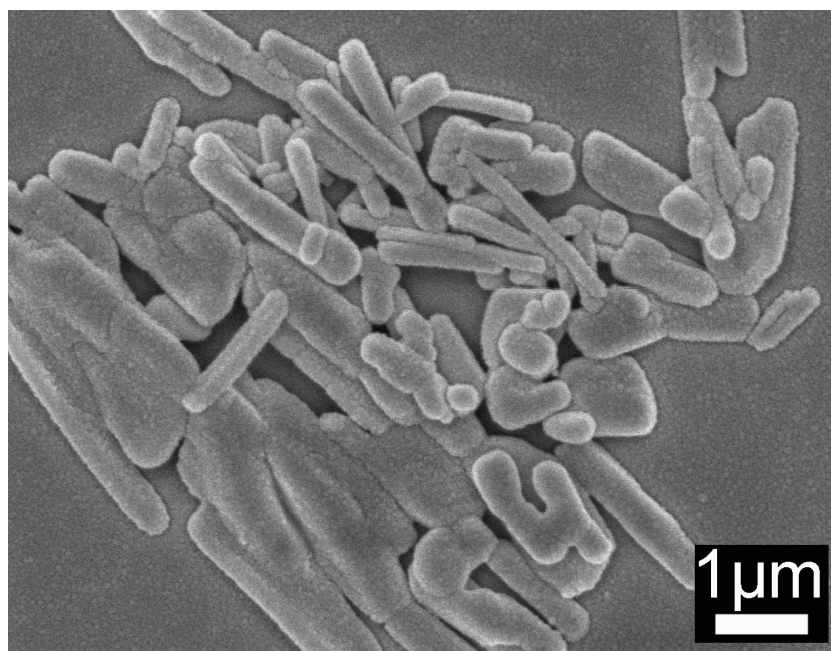

**Figure S5.** Lophine nanostructures prepared under the condition without sonication

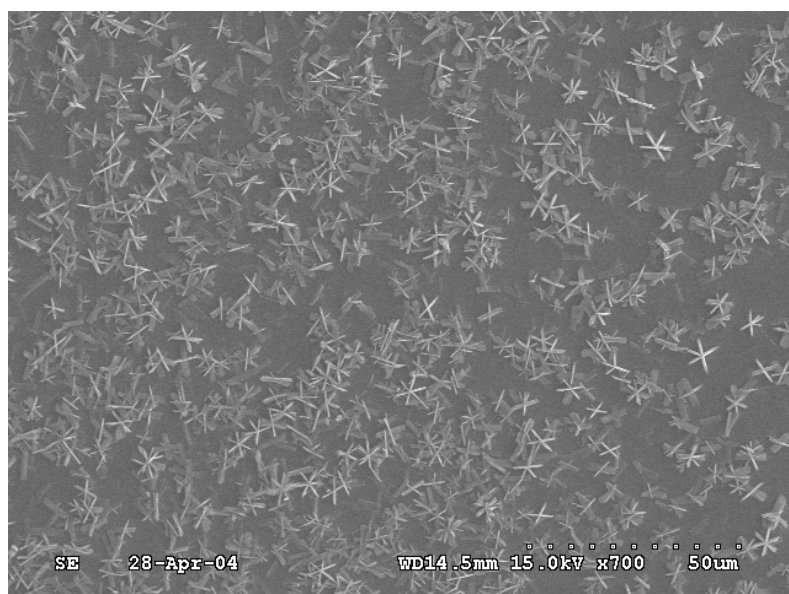

**Figure S6.** SEM image of the multipods prepared with the lophine acetone solution of  $10^{-2}$  M in concentration.

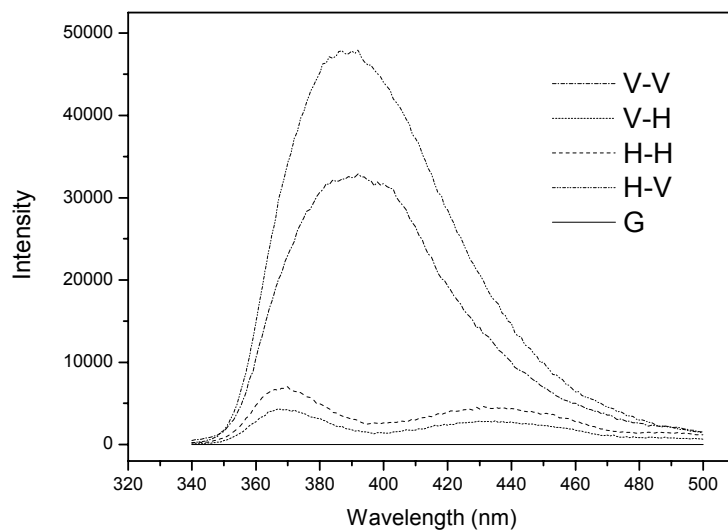

**Figure S7.** The anisotropic fluorescence spectra of the lophine nanotube sample, in which  $G$  is the emission scan factor,  $H$  is horizontal,  $V$  is vertical. For example,  $H-V$  means exciting with horizontal polarized light and detecting with vertical polarized light.
